# Supplementary figures and images for: High levels of breastmilk feeding despite a low rate of exclusive breastfeeding for 6 months in a cohort of vulnerable women in Toronto, Canada
Source: PubMed Central journal article supplement — Matern Child Nutr. 2021 Aug 8;18(1):e13260. doi: 10.1111/mcn.13260 (PMC8710126; doi:10.1111/mcn.13260), 2021-08-08

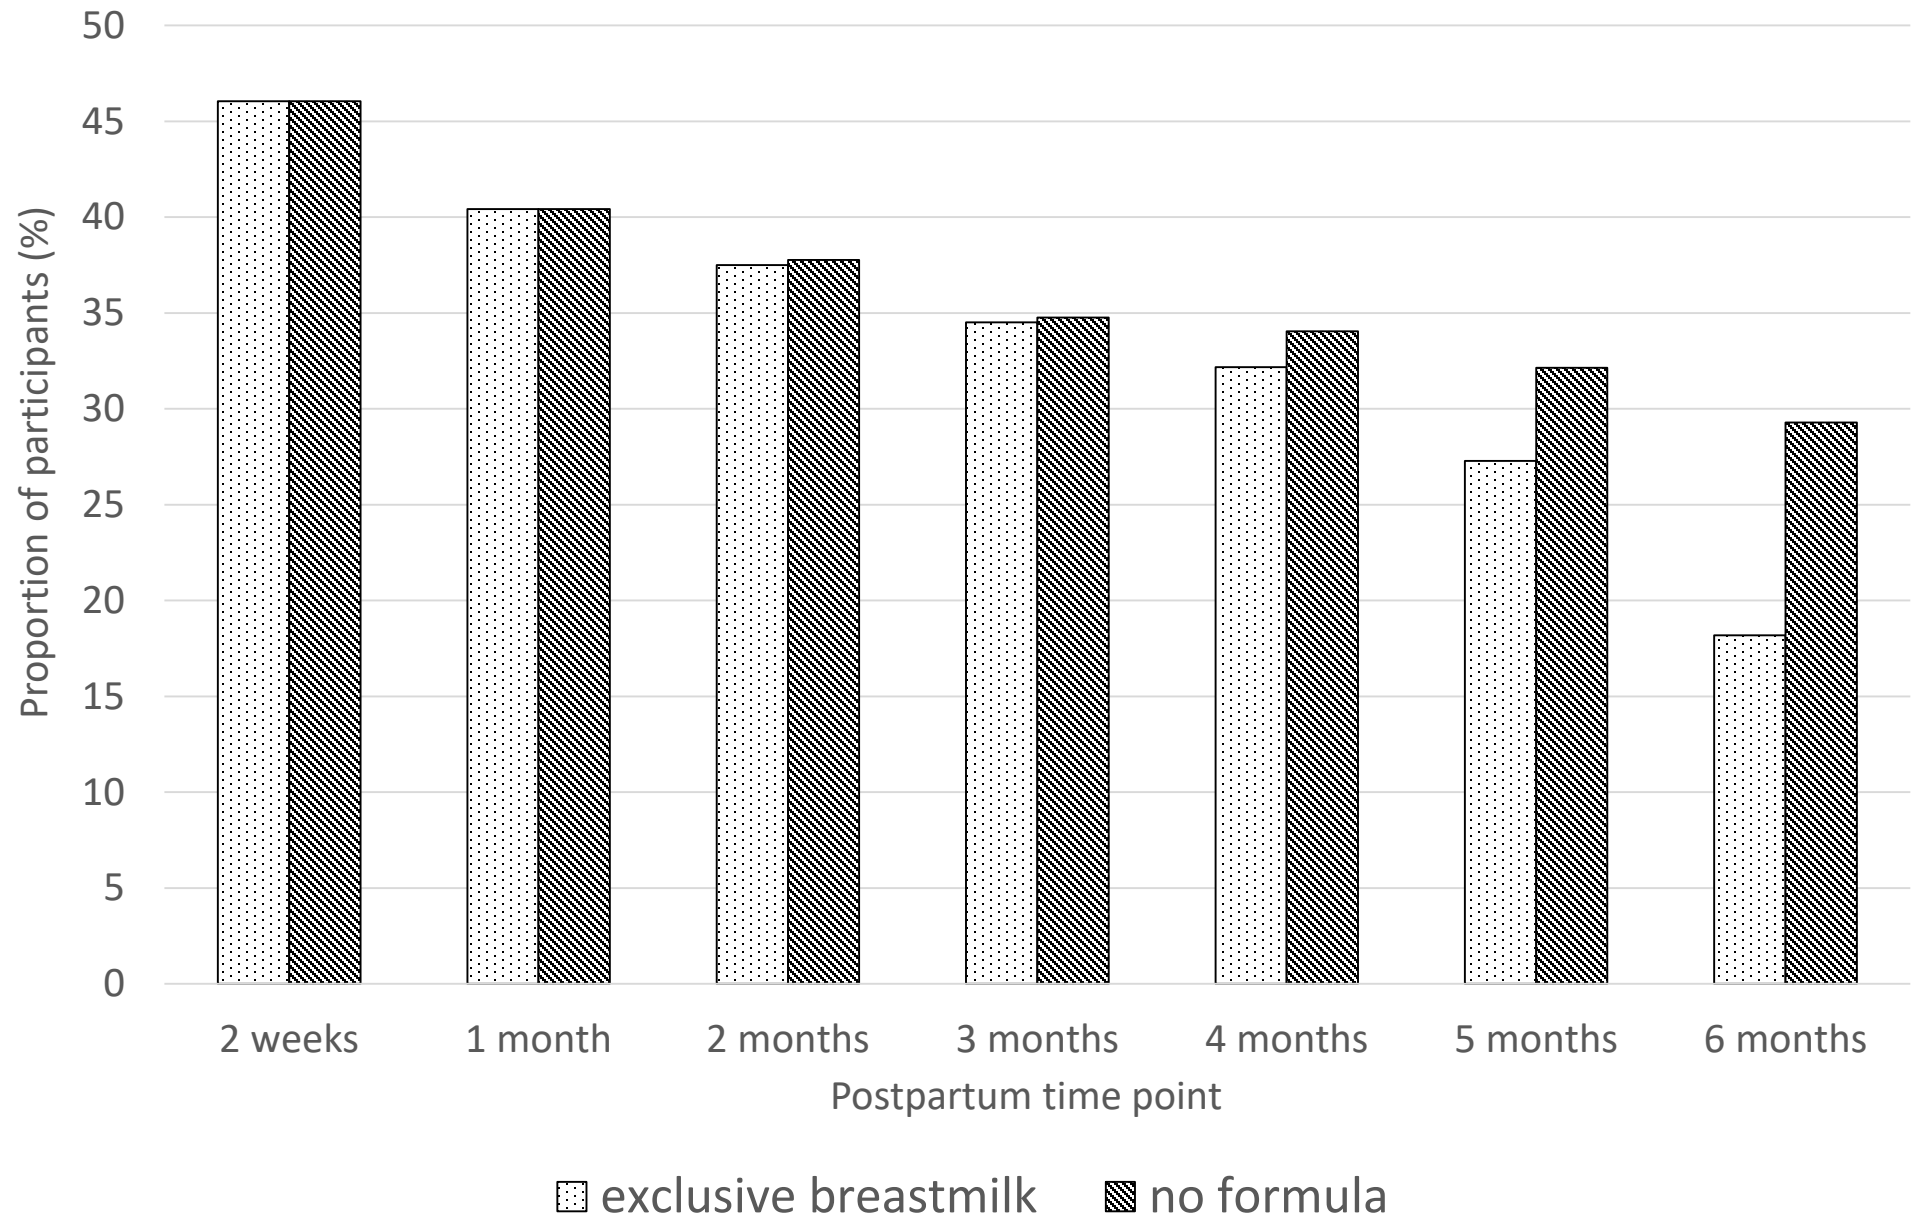

Supplement: MCN-18-e13260-s003.pdf [file MCN-18-e13260-s003.pdf]
